# Supplementary material
Source: PubMed Central journal article supplement (PMC7130411)
Supplement: mmc1.pdf [file mmc1.pdf]

# Document de synthèse

## Ouverture d'une unité COVID en Centre Hospitalier Spécialisé

Pôle Hospitalo-Universitaire de Psychiatrie d'Adultes et d'Addictologie du Grand Nancy  
Centre Psychothérapique de Nancy

Version du 23/03/2020

### Rédacteurs :

Dr Claire Jansen

Mme Emilie Kempf

Pr Vincent Laprévotte

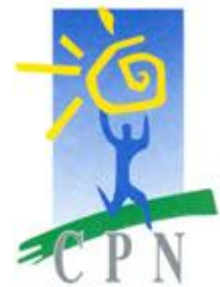

## 1. Identité administrative

### Nom et coordonnées du promoteur du projet

Centre Psychothérapique de Nancy  
Pôle Hospitalo-Universitaire de Psychiatrie d'Adultes et d'Addictologie du Grand Nancy  
Chef de Pôle : Pr Raymund Schwan

### Nom et coordonnées des responsables médicaux du projet

Pr Vincent Laprévotte, Psychiatre Responsable  
Pôle Hospitalo-Universitaire de Psychiatrie d'Adultes et d'Addictologie du Grand Nancy  
Tel. 03 83 92 68 22  
Mail : [secretariat.uniteD@cpn-laxou.com](mailto:secretariat.uniteD@cpn-laxou.com)

Dr Olivier Martin, Médecin Généraliste Responsable  
Pôle transversal medico-technique et clinique  
Unité de Médecine Polyvalente et de Spécialités  
Tel. 03 83 92 68 22  
Mail : [secretariat.uniteD@cpn-laxou.com](mailto:secretariat.uniteD@cpn-laxou.com)

### Nom et coordonnées du correspondant administratif pour le projet

Mme Michèle Brinati, Cadre supérieure de Pôle,  
Pôle Hospitalo-Universitaire de Psychiatrie d'Adultes et d'Addictologie du Grand Nancy  
Tel. 03 83 92 84 71  
Mail : [secretariat.uniteD@cpn-laxou.com](mailto:secretariat.uniteD@cpn-laxou.com)

### Cadre de santé

Mme Emilie Kempf  
Pôle Hospitalo-Universitaire de Psychiatrie d'Adultes et d'Addictologie du Grand Nancy  
Tel. 03 83 92 68 22  
Mail : [secretariat.uniteD@cpn-laxou.com](mailto:secretariat.uniteD@cpn-laxou.com)

## 2. Contexte

### 2.1. Contexte général et scientifique

La crise sanitaire liée au COVID-19 nécessite des adaptations rapides du système de soins afin de limiter l'exposition épidémique et de parfaire les soins des personnes touchées. Les personnes souffrant de troubles psychiatriques représentent une population particulière vis-à-vis de ce risque. En effet, en dehors de circonstances exceptionnelles de cette pandémie, il s'agit d'une population généralement fragilisée du point de vue sanitaire et nombre de personnes souffrant de troubles psychiatriques voient leur espérance de vie réduite (Rehm and Shield, 2019). Pour prendre un exemple, les personnes souffrant de schizophrénie voient ainsi leur espérance de vie réduite de 14,5 ans en moyenne par rapport à la population générale (Hjorthøj et al., 2017). Cette surmortalité est due avant tout à des causes naturelles (Walker et al., 2015). On retrouve en particulier le rôle des comorbidités médicales, des conduites addictives ainsi que la présence de facteurs de risques supplémentaires (hypertension artérielle, obésité, dyslipidémies). Il faut également noter les difficultés d'accès aux soins primaires dans ces populations (Ross et al., 2015).

Dans ce contexte, il est à craindre que la population de personnes souffrant de troubles psychiatriques ne soit particulièrement exposée à un risque accru de mortalité lors de la pandémie de COVID-19. Ce risque est d'autant plus important que les facteurs d'augmentation du risque de mortalité liée au COVID-19 sont plus souvent retrouvés parmi les populations souffrant de troubles psychiatriques, en particulier l'hypertension artérielle, le diabète, la présence d'une maladie coronarienne (Zhou et al., 2020).

### 2.2. Besoins locaux

Courant mars 2020, la région Grand Est a été l'une des régions françaises les plus touchées par le COVID-19, notamment dans les suites d'un rassemblement religieux ayant eu lieu fin février dans le Bas-Rhin qui aurait accéléré la dissémination (Santé Publique France. Point épidémiologique COVID-19 du 15 mars 2020). Si la Meurthe-et-Moselle a été touchée un peu plus tardivement, l'expérience des départements voisins a généré une mobilisation importante des moyens médicaux dans tous le Grand Est.

Le Centre Psychothérapique de Nancy est un Centre Hospitalier Spécialisé qui comprend 288 places d'hospitalisation à temps complet de psychiatrie d'adultes, 8 places de crise, 11 places de post-cure et 40 places d'accueil familial thérapeutique. Il fait partie du GHT 7 comprenant le CHRU de Nancy. Il comprend les équipes hospitalo-universitaires de psychiatrie d'adultes et de pédopsychiatrie de la Faculté de Médecine de Nancy.

Dès le début de la crise COVID-19, il est apparu nécessaire de développer une unité dédiée aux situations de patients nécessitant des soins psychiatriques et présentant une infection possible ou avérée par COVID 19. Cette éventualité a été envisagée pour la première fois le 9 mars 2020. Le 18 mars 2020, une décision institutionnelle d'ouverture de cette unité a été prise en cellule de crise de l'établissement, pour une **ouverture le 20 mars 2020.**

### **2.3.Objectifs généraux de l'unité**

Les objectifs de l'unité sont les suivants :

- Limiter la contagion COVID-19 au sein de lieux de promiscuité que sont les services de soins psychiatriques d'un CHS
- Poursuivre les soins psychiatriques des personnes hospitalisées
- Assurer des soins médicaux généraux optimaux pour les personnes porteuses de COVID-19

### 3. Organisation du service

#### 3.1. Ressources humaines

Etant donné le risque épidémique, nous avons constitué pour tous les professionnels une équipe de première ligne et une équipe de réserve.

| Personnel           | ETP première ligne | Réservistes | Lieu de recrutement |
|---------------------|--------------------|-------------|---------------------|
| IDE                 | 9                  | 7           | CPN                 |
| AS                  | 9 AS               | 2           | CPN + IFSI          |
| Secrétaire          | 1                  | 1           | CPN                 |
| Cadre               | 1                  | 1           | CPN                 |
| Psychiatre          | 2                  | 1 interne   | CPN                 |
| Médecin généraliste | 1                  | 1           | CPN                 |

Le **personnel paramédical** de cette unité a été recruté sur la base du volontariat via une demande du directeur des soins infirmiers à tous les cadres de pôle de relayer l'appel à volontaires dans les différentes unités. L'équipe est composée d'IDE recrutés dans tout l'établissement, les aide soignants ont été recrutés parmi les aides soignants de l'établissement et parmi les étudiants volontaires de l'IFSI (compétence 3 validée demandé). Parmi les IDE, une attention toute particulière a été mise sur le recrutement d'IDE à compétence psychiatrique issus des services de secteurs et d'IDE à compétence de médecine générale, issus du service de médecine générale de l'hôpital.

#### Organisation des postes paramédicaux

Le service est divisé en 3 secteurs et le roulement est sur 12h00.

La journée il y a un IDE et un aide soignant par secteur soit 6 soignants pour l'unité.

La nuit il y a un IDE et un AS pour toute l'unité.

Les **cadres, les secrétaires et les médecins du service** (psychiatres et médecins généralistes) ont été recrutés parmi les volontaires de l'établissement.

**Sur le plan médical**, les patients ont une double référence : médecin généraliste + médecin psychiatre. Les psychiatres ont été recrutés parmi les psychiatres de l'établissement + appel à volontariat pour réservistes. Les médecins généralistes ont été recrutés parmi l'unité de médecine générale de l'établissement.

Concernant la continuité des soins médicaux, deux systèmes sont mis en place :

- La continuité des soins psychiatriques est assurée par le système habituel de gardes et astreintes (un interne de garde + un praticien hospitalier d'astreinte)
- La continuité des soins médicaux généraux est assurée par l'interne de garde de l'établissement, soutenu par une ligne d'astreinte COVID spécifiquement mise en place et assurée par les médecins généralistes volontaires de l'établissement

### 3.2. Organisation matérielle

Le **choix du bâtiment** s'est fait sur plusieurs arguments.

- L'unité a été choisie selon des critères d'hygiène : il s'agit d'une unité isolée géographiquement du reste de l'établissement et ne communiquant pas avec d'autres services.
- Cette unité est composée de chambres seules exclusivement et suffisamment grandes pour y mettre un lit médicalisé.
- Nous avons aussi choisi une unité de soins libres car les patients étaient transférables plus facilement et les unités étaient moins remplies depuis la mesure de confinement. Au moment de décider la mise en place de l'unité, les patients qui étaient présents dans cette unité de soins libres ont été accompagnés, avec un projet personnalisé, à poursuivre les soins dans une unité équivalente de l'établissement. Ils y ont été accompagnés par une partie du personnel infirmier et médical ainsi que par une psychologue spécifiquement dédiée à cet accompagnement. Avant l'installation de l'unité COVID, le bâtiment a fait l'objet d'un bionettoyage complet.

Nous disposons de 20 chambres, 2 chambres ont un sas de décontamination réservés aux patients pour lesquels le risque de transmission est plus élevé (incontinence, excréments...). A ces places disponibles s'ajoute une chambre d'isolement psychiatrique équipée.

Les 3 secteurs du service sont donc composés de 7 lits chacun.

*Matériel commandé – en plus du matériel habituel disponible dans un service psychiatrique de secteur :*

| Matériel médical                       | Autres                                        |
|----------------------------------------|-----------------------------------------------|
| Pousse Seringue Electriques            | Machine à laver et sèche linge                |
| Nécessaire à perfusion                 | Distributeur de SHA devant chaque chambre.    |
| Bouteilles O2 ; Aérosols ; Aspirateurs | Tunique pantalon pour tous les professionnels |
| ECG ; Lecteur de BU ; Bladderscan      |                                               |
| Adapte table                           |                                               |
| Lève malade                            |                                               |
| Matelas à air                          |                                               |
| Matériel pour protocole Kalinox        |                                               |

## 4. Parcours de soins

### 4.1. Admission

L'unité est destinée aux patients du CPN avec une suspicion de COVID ou COVID avéré, nécessitant des soins psychiatriques. Elle n'est pas destinée aux personnes présentant une indication de réanimation.

Les patients peuvent être adressés par l'ensemble des services d'hospitalisation du CPN ainsi que par la MAS du CPN.

Les **critères d'admissions** sont les suivants :

- patients pour lesquels il y a une suspicion de COVID (fièvre > 38°C et/ou toux d'apparition récente) ou tout COVID confirmé par PCR
- stable sur le plan respiratoire
- en état d'être transporté sur plan psychiatrique.

En journée et en semaine, l'admission est validée par le médecin généraliste et le psychiatre référents de l'unité.

Le week-end, l'admission est organisée par l'interne de garde du site en accord avec le médecin généraliste disponible sur une ligne d'astreinte COVID.

En cas de découverte nocturne d'un patient suspect stabilisé sur le plan respiratoire, le patient est mis en isolement gouttelettes en chambre jusqu'au lendemain et respect des procédures isolement et barrière.

Pour tout patient présentant des **signes de détresse respiratoire**, un avis doit être pris auprès de la ligne d'astreinte COVID ou si urgence vitale directement au 15.

L'unité dispose d'une **chambre d'isolement psychiatrique temporaire**, mais ne présentant pas toutes les normes de sécurité d'une chambre PSI. Si le patient d'un service adresseur n'est pas transportable sur le plan psychiatrique (agitation incoercible avec maintien en PSI), le patient reste sur place, la chambre PSI servant alors de chambre d'isolement infectieux.

#### **Modalités de transfert du patient vers l'unité COVID.**

Respect de l'isolement gouttelettes :

- masque pour le patient et les soignants,
- port d'une surblouse et de gants pour les soignants
- respect des gestes barrières

### 4.2. Relais de la prise en charge

Les sorties vers les secteurs d'origine sont anticipées dès l'admission. Nous calculons dès l'entrée dans le service la **date prévisionnelle** de sortie du service Covid de la façon suivante : 14 jours après le premier symptôme suspect.

Dans le cas de patients peuvent sortants pour un retour direct à domicile, nous suivons les recommandations de l'ARS Grand Est concernant les sorties d'hospitalisation COVID du Haut Rhin: pas de

sortie d'hospitalisation s'il n'y a pas eu de contact avec le médecin traitant ou la PRAG (Plateforme Régionale d'Appui aux Généralistes).

## 5. Contenu des soins

### 5.1. Dossier patient

Nous avons veillé à ce que les antécédents médico-chirurgicaux, les antécédents psychiatriques et les antécédents addictologiques soient facilement lisibles dans le dossier médical et infirmier afin d'y avoir un accès rapide en cas de nécessité de réorientation vers les soins intensifs. L'objectif étant de tenir un dossier complet avec des renseignements orientés prise en charge multidisciplinaire.

### 5.2. Spécificité des prises en charge COVID

#### *Aspects pratiques :*

Les évaluations psychiatriques se font en chambre par des médecins psychiatres et des IDE, le rythme de l'évaluation est adaptée selon la clinique. Il n'y a pas d'activités de groupe ni de prise en charge en psychothérapie nécessitant un déplacement du patient dans le service. Les patients fumeurs sont accompagnés pour un sevrage tabac car il n'est pas autorisé de fumer dans les chambres.

Le contact avec les patients respecte l'isolement gouttelette et les précautions standards.

Les soignants portent un masque chirurgical lorsqu'ils entrent dans la chambre du patient, ils portent en plus une surblouse et des gants lorsqu'il y a des soins de contact à faire. S'il y a des soins mouillants ou souillants, ils portent en plus un tablier plastique. Les patients portent un masque chirurgical lorsqu'ils sont en présence de soignants. (ANNEXE 1)

#### *Aspects psychiatriques :*

L'objectif principal est d'évaluer la pathologie psychiatrique de base justifiant l'hospitalisation et s'assurer de la continuité des soins psychiatriques malgré la co-infection par COVID-19 ou la forte suspicion.

Puis s'y associe des éléments d'évaluation liés au contexte. En effet l'épidémie actuelle répond aux critères DSM-5 d'un événement traumatique. L'évaluation du stress aigu se fait par un médecin psychiatre selon les critères DSM-5. Il y est associé une évaluation de la détresse peri-traumatique standardisée par la PDI (Brunet et al., 2001) et de la dissociation peri traumatique par la PDEQ (Marmar et al., 1997, Birmes et al., 2005) Ces deux dimensions sont prédictives du développement d'un état de stress post traumatique et nécessitent d'être évaluée pour orienter les soins. (Bunnell et al., 2018)

De plus il a été montré en Chine que la présence de symptômes COVID est associée à une augmentation de dépression, d'anxiété et de stress. (Wang et al., 2020)

#### *Aspects médicaux généraux :*

Les patients sont évalués à l'entrée par le médecin généraliste du service qui prescrit les examens complémentaires et la surveillance clinique et para clinique. Le rythme de la réévaluation se fait selon l'état clinique du patient. Sur le site nous avons accès à la prescription de bilans sanguins, à 3 tests COVID 19 (à



l'ouverture de l'unité), aux ECG et à un bladderscan. Nous n'avons pas accès sur site à des examens radiologiques. Un infectiologue référent est disponible par téléphone pour notre unité.

Pour chaque patient, particulièrement les patients ayant des maladies pulmonaires chroniques, les traitements dépresseurs respiratoires sont réévalués quotidiennement selon le bénéfice risque.

## **6. Enjeux éthiques pour les patients atteints de formes sévères de COVID et présentant une pathologie psychiatrique**

Notre inquiétude majeure et centrale concernant les patients psychiatriques souffrants de COVID sévères sont les risques de perte de chance du fait de leur trouble psychiatrique lorsqu'il faudra faire appel aux services de soins intensifs. Nous avons donc mené une réflexion pluridisciplinaire pour décrire de façon objective nos patients à nos confrères urgentiste et réanimateur selon leurs critères d'admission.

Nos réflexions se sont basées sur le Résumé RPMO Ethique réanimation COVID19, 16 mars 2020. Nous avons documenté pour chaque patient les critères suivants :

- Etat nutritionnelle (IMC)
- volonté du patient ou directive anticipé ou souhait de la famille ou tutelle
- GIR
- Échelle de fragilité

Ces critères sont considérés par notre service comme prioritaires au diagnostic psychiatrique en cas de discussion pour des soins intensifs. **Il s'agit donc des mêmes critères que la population générale.**

Ces critères ont par ailleurs été étendus à tout l'établissement en cas de complications, non liées au covid, nécessitant une prise en charge en réanimation.

Dans les cas de personnes présentant des fragilités multiples, nous effectuons des **entretiens de recueil des directives anticipées** avant toute dégradation de l'état somatique et nous informons par téléphone les personnes de confiance désignées. Pour des raisons d'hygiène le document signé ne peut pas être sorti de la chambre du patient, les informations sont donc retranscrites dans le dossier médical. (ANNEXE 2)

## **7. Relevé de la morbidité et mortalité**

Sous l'égide de la cellule UNIC de l'établissement (Unité de recherche et d'Investigation Clinique), un relevé épidémiologique de la morbidité et de la mortalité a lieu pour chaque patient hospitalisé.

Ce relevé est décliné dans l'étude « **COVID PSY : Etude Observationnelle multicentrique non-interventionnelle de la morbidité et mortalité associée au COVID en Centre Hospitalier Spécialisé** ». Elle devrait être étendue aux établissements français volontaires fin mars 2020 grâce à la Coordination Nationale des Dispositifs Territoriaux de Recherche en Psychiatrie et Santé Mentale et à la conférence des Présidents de CME de CHS.

## 8. Bibliographie

ARS Grand Est Recommandation concernant les sorties d'hospitalisation COVID dans le Haut Rhin.

Consultable sur [https://www.grand-est.ars.sante.fr/system/files/2020-03/2020-03-10\\_Conduite%20pour%20les%20patients%20sortant%20hospitalisation%20cadre%20epidemie.pdf](https://www.grand-est.ars.sante.fr/system/files/2020-03/2020-03-10_Conduite%20pour%20les%20patients%20sortant%20hospitalisation%20cadre%20epidemie.pdf)

Birmes, P., Brunet, A., Benoit, M., Defer, S., Hatton, L., Sztulman, H., Schmitt, L., 2005. Validation of the Peritraumatic Dissociative Experiences Questionnaire self-report version in two samples of French-speaking individuals exposed to trauma. *Eur. Psychiatry* 20, 145–151. <https://doi.org/10.1016/j.eurpsy.2004.06.033>

Brunet, A., Weiss, D.S., Metzler, T.J., Best, S.R., Neylan, T.C., Rogers, C., Fagan, J., Marmar, C.R., 2001. The Peritraumatic Distress Inventory: a proposed measure of PTSD criterion A2. *Am J Psychiatry* 158, 1480–1485. <https://doi.org/10.1176/appi.ajp.158.9.1480>

Bunnell, B.E., Davidson, T.M., Ruggiero, K.J., 2018. The Peritraumatic Distress Inventory (PDI): Factor structure and predictive validity in traumatically injured patients admitted through a Level I trauma center. *J Anxiety Disord* 55, 8–13. <https://doi.org/10.1016/j.janxdis.2018.03.002>

Hjorthøj, C., Stürup, A.E., McGrath, J.J., Nordentoft, M., 2017. Years of potential life lost and life expectancy in schizophrenia: a systematic review and meta-analysis. *Lancet Psychiatry* 4, 295–301. [https://doi.org/10.1016/S2215-0366\(17\)30078-0](https://doi.org/10.1016/S2215-0366(17)30078-0)

Marmar, C.R., Weiss, D.S., Metzler, T.J., 1997. The Peritraumatic Dissociative Experiences Questionnaire, in: *Assessing Psychological Trauma and PTSD*. Guilford Press, New York, NY, US, pp. 412–428.

Rehm, J., Shield, K.D., 2019. Global Burden of Disease and the Impact of Mental and Addictive Disorders. *Curr Psychiatry Rep* 21, 10. <https://doi.org/10.1007/s11920-019-0997-0>

Ross, L.E., Vigod, S., Wishart, J., Waese, M., Spence, J.D., Oliver, J., Chambers, J., Anderson, S., Shields, R., 2015. Barriers and facilitators to primary care for people with mental health and/or substance use issues: a qualitative study. *BMC Fam Pract* 16. <https://doi.org/10.1186/s12875-015-0353-3>

Santé Publique France. Point épidémiologique COVID-19 du 15 mars 2020. Consultable sur <https://www.santepubliquefrance.fr/maladies-et-traumatismes/maladies-et-infections-respiratoires/infection-a-coronavirus/documents/bulletin-national/covid-19-point-epidemiologique-du-15-mars-2020>

Walker, E.R., McGee, R.E., Druss, B.G., 2015. Mortality in mental disorders and global disease burden implications: a systematic review and meta-analysis. *JAMA Psychiatry* 72, 334–341. <https://doi.org/10.1001/jamapsychiatry.2014.2502>

Wang, C., Pan, R., Wan, X., Tan, Y., Xu, L., Ho, C.S., Ho, R.C., 2020. Immediate Psychological Responses and Associated Factors during the Initial Stage of the 2019 Coronavirus Disease (COVID-19) Epidemic among the General Population in China. *Int J Environ Res Public Health* 17. <https://doi.org/10.3390/ijerph17051729>

Zhou, F., Yu, T., Du, R., Fan, G., Liu, Y., Liu, Z., Xiang, J., Wang, Y., Song, B., Gu, X., Guan, L., Wei, Y., Li, H., Wu, X., Xu, J., Tu, S., Zhang, Y., Chen, H., Cao, B., 2020. Clinical course and risk factors for mortality of adult inpatients with COVID-19 in Wuhan, China: a retrospective cohort study. *Lancet*. [https://doi.org/10.1016/S0140-6736\(20\)30566-3](https://doi.org/10.1016/S0140-6736(20)30566-3)

**ANNEXE 1 : Protocole Précautions complémentaires COVID-19.**

Version 01 du 18/03/2020. Référence CPN-CLI-MOP

| <b>MESURES</b>                         | <b>Application stricte des précautions standard et gouttelettes</b>                                                                                                                                                                                                                                                                                                                                                               |                                                                                                                                                                                          |
|----------------------------------------|-----------------------------------------------------------------------------------------------------------------------------------------------------------------------------------------------------------------------------------------------------------------------------------------------------------------------------------------------------------------------------------------------------------------------------------|------------------------------------------------------------------------------------------------------------------------------------------------------------------------------------------|
| Hygiène des mains des professionnels   | Friction avec la solution hydro alcoolique :<br>- avant d'entrer dans la chambre et à la sortie<br>- avant le port d'équipements de protection individuel et après le retrait<br>- avant le port de gants et après le retrait<br>- dans toutes les indications d'hygiène des mains                                                                                                                                                |                                                                                                                                                                                          |
| Port des EPI et retrait                | <u>Port des EPI :</u><br><b>avant</b> d'entrée dans la chambre<br>- friction SHA<br>- mise en place du masque<br>- mise en place des lunettes si besoin<br>- surblouse +/- tablier plastique<br>- friction SHA<br>- gants si besoin                                                                                                                                                                                               | <u>Retrait des EPI :</u><br>- retrait de la surblouse<br>- retrait des gants<br>- <b>sortie de la chambre</b><br>- friction SHA<br>- retrait des lunettes et du masque<br>- friction SHA |
| Port de gants                          | Conformément aux précautions standard :<br><p style="text-align: center;"><b>1 paire de gants = 1 geste = 1 patient</b></p> <u>Porter uniquement des gants :</u><br>- En cas de risque d'exposition au sang ou tout autre produit biologique d'origine humaine, de contact avec une muqueuse ou la peau lésée<br>- Si les mains des soignants comportent des lésions cutanées<br>Les soins sur peau saine s'effectuent sans gants |                                                                                                                                                                                          |
| Port de masque pour le <u>soignant</u> | <u>Masque chirurgical</u><br>- Port du masque nécessaire <u>dès l'entrée</u> dans la chambre<br>- La boîte de masque doit être disponible devant la porte de la chambre<br>- Retrait du masque après la sortie de la chambre<br><u>Masque FFP2</u><br>En cas de gestes invasifs au niveau de la sphère respiratoire (aspiration bronchique, kiné respiratoire...)                                                                 |                                                                                                                                                                                          |
| Lunettes                               | - En cas de risque de projection ou d'aérosolisation, à un produit biologique d'origine humaine<br>- Désinfection avec détergent désinfectant habituel après utilisation                                                                                                                                                                                                                                                          |                                                                                                                                                                                          |
| Protection de la tenue professionnelle | - Dès l'entrée dans la chambre : surblouse à usage unique<br>- En cas de soins mouillants ou souillants : port de tablier plastique en plus de la surblouse                                                                                                                                                                                                                                                                       |                                                                                                                                                                                          |
| Linge                                  | - Filière du linge habituelle<br>- Si présence d'excréta en quantité importante filière du linge contaminé (sacs hydrosoluble et sac rayés jaune et blanc)                                                                                                                                                                                                                                                                        |                                                                                                                                                                                          |

| <b>MESURES</b>                                          | Application stricte des <b>précautions standard et gouttelettes</b>                                                                                                                                                                                                                                                                                                                                                                                                                                                                                                                                                                                                                                                                              |
|---------------------------------------------------------|--------------------------------------------------------------------------------------------------------------------------------------------------------------------------------------------------------------------------------------------------------------------------------------------------------------------------------------------------------------------------------------------------------------------------------------------------------------------------------------------------------------------------------------------------------------------------------------------------------------------------------------------------------------------------------------------------------------------------------------------------|
| Déchets                                                 | <ul style="list-style-type: none"> <li>- Elimination des EPI dans la chambre avant de sortir et élimination dans la filière DASRI</li> <li>- Les masques utilisés par les professionnels sont à éliminer dans les <b>déchets ménagers</b></li> </ul>                                                                                                                                                                                                                                                                                                                                                                                                                                                                                             |
| Dispositifs médicaux                                    | Désinfection avec le détergent désinfectant sporicide avant la sortie de la chambre                                                                                                                                                                                                                                                                                                                                                                                                                                                                                                                                                                                                                                                              |
| Vaisselle                                               | Lavage habituel en lave-vaisselle – T° minimum 60°C                                                                                                                                                                                                                                                                                                                                                                                                                                                                                                                                                                                                                                                                                              |
| Bionettoyage quotidien                                  | <ul style="list-style-type: none"> <li>- Avec détergent désinfectant sporicide</li> <li>- Procédures habituelles et respect des précautions complémentaires par les agents</li> </ul>                                                                                                                                                                                                                                                                                                                                                                                                                                                                                                                                                            |
| Bionettoyage à la levée des précautions complémentaires | <ul style="list-style-type: none"> <li>- Aération pendant au moins 30 minutes</li> <li>- Nettoyage complet de la chambre et du mobilier avec le détergent désinfectant sporicide</li> <li>- Nettoyage des surfaces verticales si nécessaire</li> </ul>                                                                                                                                                                                                                                                                                                                                                                                                                                                                                           |
| Transport et services carrefours                        | <ul style="list-style-type: none"> <li>- Information du service transport et des services carrefours</li> <li>- pour le patient : tenue propre, port de masque chirurgical et hygiène des mains par le patient</li> </ul>                                                                                                                                                                                                                                                                                                                                                                                                                                                                                                                        |
| Précautions pour le patient                             | <p><u>Hygiène des mains :</u><br/>Lavage à l'eau et au savon (liquide de préférence)<br/>Sensibiliser dans la mesure du possible</p> <ul style="list-style-type: none"> <li>- pour tous les actes de la vie quotidienne (avant le repas, après avoir été aux toilettes...)</li> <li>- régulièrement au cours de la journée</li> </ul> <p><u>Port de masque chirurgical le plus possible</u> selon la compliance du patient<br/>et si possible<br/>dès la présence d'un professionnel dans la chambre</p> <p><u>Aération régulière de la chambre :</u><br/>Si possible au moins 15 minutes 2 fois par jour</p> <p><u>Linge personnel :</u><br/>- Lavage en machine à laver si possible à 60°C ou si impossible avec pré-lavage et cycle long.</p> |

**ANNEXE 2 : Fiche de directives anticipées**

# Directives anticipées

---

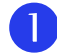

## Mon identité

Nom et prénoms : .....

Né(e) le : ..... à : .....

Domicilié(e) à : .....

.....

Si je bénéficie d'une mesure de tutelle au sens du Chapitre II du titre XI du livre I<sup>er</sup> du code civil :

- j'ai l'autorisation du juge       Oui       Non

- du conseil de famille       Oui       Non

Veillez joindre la copie de l'autorisation.

2

## Informations ou souhaits

que je veux exprimer en dehors de mes directives anticipées

figurant sur la fiche 3 ci-après

Si je pense que, pour bien comprendre mes volontés exprimées dans l'un des modèles ci-après, le médecin qui s'occupera de moi lors de ma fin de vie doit connaître :

- certaines informations (par exemple sur ma situation personnelle, ma famille ou mes proches)
- certaines de mes craintes, de mes attentes ou de mes convictions (par exemple sur la solitude et la douleur en fin de vie ou sur le lieu où je souhaite finir mes jours),

Je les écris ici :

.....

.....

.....

Fait le ..... à .....

**Signature**

3

## Mes directives anticipées

### Modèle A

Je rédige les présentes directives anticipées **pour le cas où je ne serais plus en mesure de m'exprimer au moment de la fin de ma vie**

Mes volontés sont les suivantes :

1°) à propos des situations dans lesquelles je risque de me trouver (par exemple, situation de coma en phase terminale d'une maladie)

J'indique ici notamment si j'accepte ou si je refuse que l'on me maintienne artificiellement en vie dans le cas où j'aurais définitivement perdu conscience et où je ne pourrais plus communiquer avec mes proches :

.....

.....

2°) à propos des actes et des traitements médicaux dont je pourrais faire l'objet

La loi prévoit qu'au titre du refus de l'obstination déraisonnable, ils peuvent ne pas être entrepris ou être arrêtés s'ils apparaissent inutiles, disproportionnés ou n'ayant d'autre effet que le seul maintien artificiel de la vie



► J'indique donc ici si j'accepte ou si je refuse qu'ils soient entrepris, notamment :

- Une réanimation cardiaque et respiratoire (tube pour respirer) :.....
- Le branchement de mon corps sur un appareil à dialyse rénale :.....
- Une intervention chirurgicale :.....
- Autre :.....

► Si ces actes ou traitements ont déjà été entrepris, j'indique ici si j'accepte ou si je refuse qu'ils soient arrêtés notamment :

- Assistance respiratoire (tube pour respirer) :.....
- Dialyse rénale :.....
- Alimentation et hydratation artificielles :.....
- Autre :.....

- ▶ Enfin, si mon médecin m'a parlé de manière plus précise d'autres actes ou traitements qui pourraient être entrepris ou maintenus compte tenu de la maladie dont je suis atteint, j'indique ici ceux dont j'accepte ou ceux dont je refuse la mise en œuvre ou la poursuite :

.....  
.....

**3°) à propos de la sédation profonde et continue associée à un traitement de la douleur**

En cas d'arrêt des traitements qui me maintiennent artificiellement en vie, j'indique ici si je veux ou non bénéficier d'une sédation profonde et continue associée à un traitement de la douleur, c'est-à-dire d'un traitement qui m'endort et a pour objectif la perte de conscience jusqu'à mon décès :

.....  
.....

Fait le ..... à .....

**Signature**

4

## Nom et coordonnées de ma personne de confiance<sup>4</sup>

Si vous ne l'avez pas déjà fait, et si vous le souhaitez, cette fiche vous permet de désigner votre «**personne de confiance**». La loi prévoit que cette personne témoignera de vos volontés et parlera en votre nom si vous ne pouvez plus vous exprimer : elle sera consultée en premier si vous n'avez pas rédigé vos directives anticipées ou si vos directives se trouvaient difficilement accessibles au moment où votre médecin aurait besoin de les consulter.

Je soussigné(e) nom, prénoms, date et lieu de naissance

.....  
.....

désigne la personne de confiance suivante :

Nom et prénoms :.....

Domicilié(e) à :.....

Téléphone privé :..... Téléphone professionnel :.....

Téléphone privé :..... Email :.....

▶ Je lui ai fait part de mes directives anticipées ou de mes volontés si un jour je ne suis plus en état de m'exprimer :

Oui       Non

▶ Elle possède un exemplaire de mes directives anticipées :

Oui       Non

Fait le ..... à .....

**Votre signature**

**Signature de la personne de confiance**

4 au sens de l'article L.1111-6 du code de la santé publique

5

## Modification ou annulation de mes directives anticipées

Je soussigné(e)

Nom et prénoms : .....

► Si vous souhaitez modifier vos directives anticipées, vous pouvez en rédiger de nouvelles et demander à votre médecin, à l'hôpital ou à l'établissement médicosocial qui les a conservées de supprimer ou détruire les précédentes. Si elles ont été enregistrées sur votre dossier médical partagé, vous pouvez en enregistrer de nouvelles. Seul le document le plus récent fait foi.

► Ou : **Déclare annuler mes directives anticipées datées du** .....

Fait le ..... à .....

**Signature**
