# Supplementary material
Source: PubMed Central journal article supplement (PMC7130411)
Supplement: mmc2.pdf [file mmc2.pdf]

# CORONAVIRUS :

## 13 RECOMMANDATIONS

### POUR « MIEUX VIVRE » LE CONFINEMENT

**1- COMPRENDRE LE RISQUE ET S'INFORMER :** informez-vous sur l'épidémie et les mesures de confinement en utilisant uniquement des sources fiables, tout en limitant votre exposition aux médias. Vous pouvez obtenir des informations claires et mises à jour régulièrement sur la page web du gouvernement dédiée à cela :

<https://www.gouvernement.fr/info-coronavirus>

**2- ASSURER SON CONFORT :** assurez-vous d'avoir ce qu'il vous faut pour que vous et votre famille vous sentiez en sécurité et confortables pendant la période de confinement. Il est important que vous gardiez à l'esprit qu'acheter le nécessaire n'est pas l'anticipation d'une pénurie. En effet, il est souhaitable de rester rationnel face à ce que l'on voit dans les magasins : si certains magasins manquent de produit, la raison tend plutôt à être des achats en quantité trop importante de la part de certains et non l'annonce d'une pénurie.

**3- EVITER LE STRESS LIÉ AUX QUESTIONS ADMINISTRATIVES ET FINANCIÈRES :** renseignez-vous quant aux mesures prises par votre employeur et l'Etat afin d'assurer votre revenu et l'accès à vos droits : <https://www.gouvernement.fr/info-coronavirus> avec une section dédiée : Espace pour les professionnels.

**4- RESTER CONNECTÉ(E) AVEC SES PROCHES :** utilisez toutes les ressources numériques pour garder le lien avec ceux qui vous sont chers. La distanciation physique n'implique pas la fin de la connexion sociale, d'autres modes de lien sont possibles (téléphone, mails, messageries instantanées, Visio-conférence, etc.). Ainsi, vous pouvez organiser des visio-conférences régulières avec un groupe d'amis. Afin de conserver le lien avec vos proches en EHPAD, vous pouvez les contacter et voir dans quelle mesure il est possible d'envoyer des lettres papiers ou d'avoir une connexion numérique (type visio-conférence) avec votre proche. Vous pouvez aussi reprendre contact avec des personnes avec lesquelles vous étiez moins en lien ces derniers temps

Pour quoi faire ? Il est important de conserver l'appartenance à des groupes sociaux, d'autant plus pendant cette période. Cela vous permettra de vous rendre compte de vécus similaires au votre, d'échanger, de partager vos ressentis, émotions, ou aborder divers sujets. Avoir du support social vous permettra de réinterpréter plus favorablement la situation ou bien de vous distraire d'une situation stressante. Pour autant, nous vous invitons à ne pas tomber dans la rumination d'émotions difficiles ; face à cela, mieux vaut vous occuper l'esprit ou essayer de trouver comment vous rendre acteur face à la situation (Voir le point 12).

**5- UTILISER DES STRATÉGIES DE RELAXATION ET D'ADAPTATION:** évitez la peur et l'ennui en faisant plusieurs activités quotidiennes :

- La lecture (ex : <https://disciplines.ac-toulouse.fr/documentation/reservoir-de-livres-numeriques-libres>) ;
- Les jeux ;
- Entretenez le lien social à distance ;
- Faites de l'activité physique en intérieur (nombreuses ressources et vidéos sur internet) ;
- Faites des activités relaxantes comme le yoga, la méditation, des exercices de respirations (ressources sur internet), de la mindfulness (avoir conscience du moment présent, de ce que nous ressentons dans notre corps à un moment précis : plus d'informations sur internet), de la peinture, du dessin, jouer des instruments de musiques, chanter, écouter de la musique, écrire, etc. ;
- Si votre lieu de vie est trop silencieux et que cela vous pèse, vous pouvez mettre de la musique ou des enregistrements de bruits d'animaux/de la nature si cela vous manque ;
- Lorsque vous vous lavez les mains, essayez de déjà prévoir quelque chose à faire tout de suite après ;
- Ne restez pas assis trop longtemps, pensez à vous lever, rester debout quelques minutes avant de vous rasseoir.

**6- CONSERVER UNE ALIMENTATION SAINE :** Mangez le même nombre de repas qu'il est préconisé avec des quantités similaires, buvez de l'eau régulièrement, mangez des protéines qui apportent des ressources à votre cerveau, ainsi que cinq fruits et légumes par jour, essayer de réduire vos consommations de caféine et théine qui pourrait vous rendre plus irritable ou anxieux.

**7- CONSERVER UN ESPACE DE VIE BÉNÉFIQUE :** Aérez régulièrement votre lieu de vie, aménagez-le de la manière qui vous convient le mieux afin que vous vous y sentiez bien. Essayer d'aller chaque jour sur votre balcon, dans votre jardin ou près d'une fenêtre ouverte afin de respirer l'air extérieur.

**8- PRÉSERVER SON SOMMEIL :** conservez un rythme veille-sommeil normal pour éviter d'augmenter votre niveau de fatigue qui pourrait engendrer davantage d'anxiété. Conservez des horaires de coucher et de lever similaires afin de garder un rythme. Vous dormirez mieux, serez plus reposé(e) et cela donnera un cadre pour vos journées.

**9- LIMITER LA PRISE DE TOXIQUES ET L'EXPOSITION AUX ÉCRANS :** l'ennui peut mener à une consommation accrue d'alcool et de toxiques et une surexposition aux écrans qui peuvent être délétères pour votre santé mentale et vous amener à être plus fortement sujet à des insomnies.

**10- GÉRER LE STRESS LIÉ À L'ÉPIDÉMIE :** il est normal de craindre d'être infecté(e). Prenez le temps de vous informer sur les symptômes de l'infection et de discuter avec vos proches si vous êtes inquiet(e). En cas de doute, vous pouvez opter pour la téléconsultation. Pour en savoir plus à ce sujet, la page de l'assurance maladie : <https://www.ameli.fr/rhone/assure/remboursements/rembourse/telemedecine/teleconsultation>

Ainsi que des liens de sites proposant cet outil :

<https://www.livi.fr/>

[https://www.doctolib.fr/video\\_consultation](https://www.doctolib.fr/video_consultation)

<https://www.medecindirect.fr/>

<https://www.qare.fr/>

Afin de gérer le stress vous pouvez vous orienter vers des exercices de respirations, de méditations ou de sophrologie (ressources sur internet). Vous pouvez pratiquer ces exercices dans les moments difficiles ou bien les mettre en place de manière régulière ce qui vous aidera à réguler votre stress plus globalement, voire même d'autres émotions. En régulant ce stress, vous pourrez observer que votre interprétation de la situation aura tendance à être plus positive.

**11- CONSERVER UNE BONNE ENTENTE AVEC LES PERSONNES SUR NOTRE LIEU DE VIE :** Vivre continuellement avec d'autres personnes (famille, amis, proches, colocataires) sur notre lieu de vie peut amener certains conflits ou mésententes avec ces personnes. Il vous est conseillé d'accorder des espaces et des temps qui soient propres à chacun et privés. Il est primordial d'investir la communication avec ces personnes en privilégiant un échange qui soit sincère, prenant en compte vos besoins et ceux de l'autre. Ainsi, si une situation vous a particulièrement atteint, prenez un temps pour en discuter avec l'autre. Partagez les faits propres à une situation précise (sans généraliser). Exprimez vos émotions et sentiments que vous ont fait vivre cette situation. Faites part des besoins que vous auriez eus lors de cet événement en invitant l'autre à faire de même afin de mieux comprendre le pourquoi de la situation. Enfin, sur la base des besoins de chacun, faites une demande, courte et négociable, qui permettra de former une sorte de « contrat » avec l'autre. Ce mode de communication permet d'amoindrir les échanges houleux entre les individus et d'accroître une entente bénéfique à court et long terme.

**12- PENSER QUE CE CONFINEMENT EST UN ACTE D'ALTRUISME :** avoir en tête que cette période d'isolement constitue pour chacun(e) d'entre nous la meilleure manière d'être ensemble à l'heure actuelle et d'œuvrer pour le bien commun. Vous pouvez organiser un système d'entraide auprès des personnes âgées ou plus à risques. Par exemple afin de leur porter des courses tout en conservant les mesures d'hygiène nécessaires ou encore proposer à des personnes isolées de les appeler ou de rester en contact avec elle de manière régulière (téléphone, visio-conférence, réseaux sociaux, lettre, etc.). Il est important et aidant de pouvoir se sentir acteur et utile dans ces circonstances particulières. C'est une manière d'avoir un pouvoir d'action sur la situation qui permet de relativiser sur celle-ci et contrebalancer face à une anxiété potentielle. Nous vous invitons à innover au sein de votre entourage, immeuble etc.

**13- POUR LES PERSONNES ATTEINTES D'UNE MALADIE CHRONIQUE :** n'arrêtez pas les traitements de votre maladie chronique gardez un lien téléphonique avec les professionnels. Les services de soins de médecine générale comme de toutes les spécialités s'organisent pour maintenir les suivis par téléphone et éviter des ruptures de soin. De plus, les pharmacies sont habilitées à renouveler les ordonnances, sous certaines conditions, jusqu'au 31 mai 2020.

Service Hospitalo-Universitaire – Pôle Ouest — 23/03/2020
